# Supplementary material for: The effect of forward postural lean on running economy, kinematics, and muscle activation
Source: PubMed Central journal article supplement (PMC11135760; doi:10.1371/journal.pone.0302249), 2024-05-29
Supplement: pone.0302249.s001.pdf [file pone.0302249.s001.pdf]

| Subject | Lean | A_vs_T | Condition | MASS_KG | HEIGHT_M | GROSS_COST | NET_COST |
|---------|------|--------|-----------|---------|----------|------------|----------|
| 1       | N/A  | N/A    | 0         | 65.15   | 1.79     | 1.71       |          |
| 2       | N/A  | N/A    | 0         | 74.75   | 1.84     | 1.08       |          |
| 3       | N/A  | N/A    | 0         | 53.4    | 1.61     | 1.50       |          |
| 4       | N/A  | N/A    | 0         | 68.2    | 1.75     | 1.26       |          |
| 5       | N/A  | N/A    | 0         | 62.5    | 1.685    | 1.78       |          |
| 6       | N/A  | N/A    | 0         | 57      | 1.66     | 1.26       |          |
| 7       | N/A  | N/A    | 0         | 65.3    | 1.793    | 1.21       |          |
| 8       | N/A  | N/A    | 0         | 56.8    | 1.723    | 1.43       |          |
| 9       | N/A  | N/A    | 0         | 58.6    | 1.74     | 1.20       |          |
| 10      | N/A  | N/A    | 0         | 54.15   | 1.62     | 0.44       |          |
| 11      | N/A  | N/A    | 0         | 46.1    | 1.59     | 1.54       |          |
| 12      | N/A  | N/A    | 0         | 56.9    | 1.67     | 1.45       |          |
| 13      | N/A  | N/A    | 0         | 57.8    | 1.67     | 1.29       |          |
| 14      | N/A  | N/A    | 0         | 62.3    | 1.71     | 1.16       |          |
| 15      | N/A  | N/A    | 0         | 60.15   | 1.8      | 1.37       |          |
| 16      | N/A  | N/A    | 0         | 73.25   | 1.91     | 1.65       |          |
| 1       | 3    | 3      | 1         | 65.15   | 1.79     | 14.58      | 12.87    |
| 2       | 3    | 3      | 1         | 74.75   | 1.84     | 11.17      | 10.09    |
| 3       | 3    | 3      | 1         | 53.4    | 1.61     | 13.00      | 11.49    |
| 4       | 3    | 3      | 1         | 68.2    | 1.75     | 13.12      | 11.87    |
| 5       | 3    | 3      | 1         | 62.5    | 1.685    | 14.14      | 12.36    |
| 6       | 3    | 3      | 1         | 57      | 1.66     | 14.28      | 13.02    |
| 7       | 3    | 3      | 1         | 65.3    | 1.793    | 10.10      | 8.89     |
| 8       | 3    | 3      | 1         | 56.8    | 1.723    | 13.05      | 11.62    |
| 9       | 3    | 3      | 1         | 58.6    | 1.74     | 12.47      | 11.26    |
| 10      | 3    | 3      | 1         | 54.15   | 1.62     | 10.36      | 9.92     |
| 11      | 3    | 3      | 1         | 46.1    | 1.59     | 12.38      | 10.84    |
| 12      | 3    | 3      | 1         | 56.9    | 1.67     | 13.45      | 11.99    |
| 13      | 3    | 3      | 1         | 57.8    | 1.67     | 11.93      | 10.64    |
| 14      | 3    | 3      | 1         | 62.3    | 1.71     | 12.79      | 11.63    |
| 15      | 3    | 3      | 1         | 60.15   | 1.8      | 13.03      | 11.65    |
| 16      | 3    | 3      | 1         | 73.25   | 1.91     | 14.03      | 12.39    |
| 1       | 2    | 1      | 2         | 65.15   | 1.79     | 15.34      | 13.63    |
| 2       | 2    | 1      | 2         | 74.75   | 1.84     | 11.59      | 10.52    |
| 3       | 2    | 1      | 2         | 53.4    | 1.61     | 13.75      | 12.24    |
| 4       | 2    | 1      | 2         | 68.2    | 1.75     | 15.73      | 14.48    |
| 5       | 2    | 1      | 2         | 62.5    | 1.685    | 15.37      | 13.59    |
| 6       | 2    | 1      | 2         | 57      | 1.66     | 14.66      | 13.40    |
| 7       | 2    | 1      | 2         | 65.3    | 1.793    | 11.20      | 9.98     |
| 8       | 2    | 1      | 2         | 56.8    | 1.723    | 13.72      | 12.29    |
| 9       | 2    | 1      | 2         | 58.6    | 1.74     | 13.48      | 12.27    |
| 10      | 2    | 1      | 2         | 54.15   | 1.62     | 11.66      | 11.22    |
| 11      | 2    | 1      | 2         | 46.1    | 1.59     | 12.76      | 11.21    |
| 12      | 2    | 1      | 2         | 56.9    | 1.67     | 15.49      | 14.03    |
| 13      | 2    | 1      | 2         | 57.8    | 1.67     | 12.38      | 11.10    |
| 14      | 2    | 1      | 2         | 62.3    | 1.71     | 12.98      | 11.82    |
| 15      | 2    | 1      | 2         | 60.15   | 1.8      | 15.20      | 13.82    |
| 16      | 2    | 1      | 2         | 73.25   | 1.91     | 15.54      | 13.90    |
| 1       | 1    | 1      | 3         | 65.15   | 1.79     | 14.00      | 12.29    |

|    |   |   |   |       |       |       |       |
|----|---|---|---|-------|-------|-------|-------|
| 2  | 1 | 1 | 3 | 74.75 | 1.84  | 10.78 | 9.70  |
| 3  | 1 | 1 | 3 | 53.4  | 1.61  | 12.69 | 11.19 |
| 4  | 1 | 1 | 3 | 68.2  | 1.75  | 13.95 | 12.70 |
| 5  | 1 | 1 | 3 | 62.5  | 1.685 | 14.78 | 13.00 |
| 6  | 1 | 1 | 3 | 57    | 1.66  | 14.12 | 12.86 |
| 7  | 1 | 1 | 3 | 65.3  | 1.793 | 10.96 | 9.75  |
| 8  | 1 | 1 | 3 | 56.8  | 1.723 | 13.26 | 11.82 |
| 9  | 1 | 1 | 3 | 58.6  | 1.74  | 12.80 | 11.59 |
| 10 | 1 | 1 | 3 | 54.15 | 1.62  | 10.62 | 10.18 |
| 11 | 1 | 1 | 3 | 46.1  | 1.59  | 12.61 | 11.07 |
| 12 | 1 | 1 | 3 | 56.9  | 1.67  | 13.67 | 12.21 |
| 13 | 1 | 1 | 3 | 57.8  | 1.67  | 12.01 | 10.72 |
| 14 | 1 | 1 | 3 | 62.3  | 1.71  | 12.61 | 11.46 |
| 15 | 1 | 1 | 3 | 60.15 | 1.8   | 14.25 | 12.88 |
| 16 | 1 | 1 | 3 | 73.25 | 1.91  | 14.25 | 12.60 |
| 1  | 2 | 2 | 4 | 65.15 | 1.79  | 16.20 | 14.49 |
| 2  | 2 | 2 | 4 | 74.75 | 1.84  | 11.49 | 10.41 |
| 3  | 2 | 2 | 4 | 53.4  | 1.61  | 13.57 | 12.07 |
| 4  | 2 | 2 | 4 | 68.2  | 1.75  | 15.47 | 14.22 |
| 5  | 2 | 2 | 4 | 62.5  | 1.685 | 15.73 | 13.95 |
| 6  | 2 | 2 | 4 | 57    | 1.66  | 14.75 | 13.49 |
| 7  | 2 | 2 | 4 | 65.3  | 1.793 | 11.84 | 10.63 |
| 8  | 2 | 2 | 4 | 56.8  | 1.723 | 12.85 | 11.42 |
| 9  | 2 | 2 | 4 | 58.6  | 1.74  | 12.83 | 11.62 |
| 10 | 2 | 2 | 4 | 54.15 | 1.62  | 10.97 | 10.54 |
| 11 | 2 | 2 | 4 | 46.1  | 1.59  | 12.65 | 11.10 |
| 12 | 2 | 2 | 4 | 56.9  | 1.67  | 15.49 | 14.04 |
| 13 | 2 | 2 | 4 | 57.8  | 1.67  | 11.97 | 10.69 |
| 14 | 2 | 2 | 4 | 62.3  | 1.71  | 12.89 | 11.73 |
| 15 | 2 | 2 | 4 | 60.15 | 1.8   | 15.46 | 14.08 |
| 16 | 2 | 2 | 4 | 73.25 | 1.91  | 15.34 | 13.70 |
| 1  | 1 | 2 | 5 | 65.15 | 1.79  | 14.20 | 12.49 |
| 2  | 1 | 2 | 5 | 74.75 | 1.84  | 10.70 | 9.62  |
| 3  | 1 | 2 | 5 | 53.4  | 1.61  | 13.44 | 11.94 |
| 4  | 1 | 2 | 5 | 68.2  | 1.75  | 13.93 | 12.68 |
| 5  | 1 | 2 | 5 | 62.5  | 1.685 | 14.70 | 12.92 |
| 6  | 1 | 2 | 5 | 57    | 1.66  | 13.98 | 12.72 |
| 7  | 1 | 2 | 5 | 65.3  | 1.793 | 12.11 | 10.90 |
| 8  | 1 | 2 | 5 | 56.8  | 1.723 | 13.14 | 11.71 |
| 9  | 1 | 2 | 5 | 58.6  | 1.74  | 12.78 | 11.58 |
| 10 | 1 | 2 | 5 | 54.15 | 1.62  | 11.07 | 10.64 |
| 11 | 1 | 2 | 5 | 46.1  | 1.59  | 12.54 | 11.00 |
| 12 | 1 | 2 | 5 | 56.9  | 1.67  | 13.94 | 12.49 |
| 13 | 1 | 2 | 5 | 57.8  | 1.67  | 11.95 | 10.67 |
| 14 | 1 | 2 | 5 | 62.3  | 1.71  | 12.48 | 11.32 |
| 15 | 1 | 2 | 5 | 60.15 | 1.8   | 14.08 | 12.71 |
| 16 | 1 | 2 | 5 | 73.25 | 1.91  | 14.66 | 13.02 |
| 1  | 0 | 0 | 6 | 65.15 | 1.79  | 14.19 | 12.48 |
| 2  | 0 | 0 | 6 | 74.75 | 1.84  | 11.02 | 9.94  |
| 3  | 0 | 0 | 6 | 53.4  | 1.61  | 12.71 | 11.21 |
| 4  | 0 | 0 | 6 | 68.2  | 1.75  | 13.86 | 12.61 |

|    |   |   |   |       |       |       |       |
|----|---|---|---|-------|-------|-------|-------|
| 5  | 0 | 0 | 6 | 62.5  | 1.685 | 14.02 | 12.24 |
| 6  | 0 | 0 | 6 | 57    | 1.66  | 13.91 | 12.65 |
| 7  | 0 | 0 | 6 | 65.3  | 1.793 | 11.36 | 10.15 |
| 8  | 0 | 0 | 6 | 56.8  | 1.723 | 12.62 | 11.19 |
| 9  | 0 | 0 | 6 | 58.6  | 1.74  | 12.83 | 11.62 |
| 10 | 0 | 0 | 6 | 54.15 | 1.62  | 10.55 | 10.12 |
| 11 | 0 | 0 | 6 | 46.1  | 1.59  | 12.53 | 10.99 |
| 12 | 0 | 0 | 6 | 56.9  | 1.67  | 12.86 | 11.41 |
| 13 | 0 | 0 | 6 | 57.8  | 1.67  | 11.75 | 10.46 |
| 14 | 0 | 0 | 6 | 62.3  | 1.71  | 12.59 | 11.43 |
| 15 | 0 | 0 | 6 | 60.15 | 1.8   | 13.57 | 12.20 |
| 16 | 0 | 0 | 6 | 73.25 | 1.91  | 14.43 | 12.78 |
